# Supplementary material for: Potential Artifacts in Conservation Laws and Invariants Inferred from Sequential State Estimation
Source: Copernicus journal article supplement (doi:10.5194/egusphere-2023-140), 2023-02-21
Supplement: Supplementary file [file egusphere-2023-140-AC2-supplement.pdf]

## Response to Reviewer #2

We thank reviewer #2 for providing thoughtful comments on the manuscript, all of which are greatly appreciated. We first address the major comment suggested, and an enumerated list of responses to the minor comments follows. Reviewer's comments are reproduced in *italic*.

The major comment provided was to summarize and to move much of the content of the introduction to the appendix, and instead to expand on the consequences:

*The paper addresses an important topic that is often overlooked or ignored. The respective debate goes on for quite some time and is definitely picked up and addressed in the paper by Bengtson et al. The paper is cited, but primarily with respect to observational inhomogeneities. The paper itself makes a very clear statement in the same direction as is being done here: that estimates of the past and future climate needs to be dynamically consistent and preserve basic principles. Might be useful to stress this latter point more beyond the reference to the Dee paper.*

*Having this said, I do like the paper on the one hand because of its message. However, similar to a pre-cursor of the paper, it has a very strong text-book or tutorial character and over large parts agrees with the text books of Carl Wunsch. I do understand the rationale for including the material. But I also think that the paper can benefit substantially by moving much of this into the appendix and, instead expand on the messages that should be conveyed (see also below). In a nutshell, they could be summarized as:*

*Changes in important functions such as total mass and energy, or volumetric current transports, usually are impacted in non-physical ways by (sequential) data assimilation approaches, hindering the process of inferring climate change related trends from reanalyses. This is because entry of data leads to violation of conservation and other invariant rules. This holds for filter approaches, but even in finite interval smoothing method uncertainties in all such estimation results remain. This message is important. However, I wish a bit more emphasis would have been given on the cure so that the reader is not left with a hopeless feeling.*

We thank the reviewer for their suggestion regarding the manuscript's style and forward, but beg to disagree. The introduction and much of the manuscript is already much shortened compared to the first version that this reviewer saw. The shorter version of the introduction as is provides a useful – and necessary – self-contained formal framing of the problem. Furthermore, changing the format of the manuscript to a Commentary would make it a different manuscript altogether.

We concur with the suggestion to expand more on how to remedy (“cure”) some of the underlying issues. In response, we now provide an extensive final paragraph in the Conclusions section. We note that a sequel paper is in preparation, which discusses some of these methods in detail. Adding them here would make this manuscript too long.

We now go over the minor comments provided.

1. *“The papers is written in places in ways that I think are bit cryptic and definitely can be improved. As an example, the first sentence of the abstract is sitting there and the reader wonders what is the connection to the rest of the abstract? Same with the last sentence: here I wish the authors would make a clear statement about what can be done and what cannot be done.”*

We thank the reviewer for these suggestions. In response, we have rewritten the abstract, and have attempted to better clarify the connection from beginning to end. In particular, the first sentence has been altered to read:

“ In sequential estimation methods often used in oceanic and general climate calculations of the state and of forecasts, observations act mathematically and statistically as source or sink terms in conservation equations for heat, salt, mass, and momentum.”

Discussion – even abbreviated – of what can and cannot be done would vastly exceed the space for the abstract, but we have added a brief sentence at the end as follows:

“Application of smoother-type methods that are designed for optimal reconstruction purposes alleviate some of the issues.”

2. *“While re-writing the abstract, I suggest deleting “equation” in line 5 and spell out what “many of the issues” are.”*  
We clarify what issues we mean by altering the abstract to now read:

“In sequential estimation methods often used in oceanic and general climate calculations of the state and of forecasts, observations act mathematically and statistically as source or sink terms in conservation equations for heat, salt, mass, and momentum. These artificial terms obscure the inference of the system’s variability or secular changes. Furthermore, for purposes of calculating changes in important functions of state variables such as total mass and energy, or volumetric current transports, results of both filter and smoother-based estimates are sensitive to mis-representation of a large variety of parameters, including initial conditions, prior uncertainty covariances, and systematic and random errors in observations. Here, toy models of a coupled mass-spring oscillator system and of a barotropic Rossby-wave system are used to demonstrate many of the issues that arise from such mis-representations.”

3. *“The first sentence of the introduction is hard to read. I suggest to re-write. Same with the sentence starting line 27. In fact, I suggest re-writing the entire paragraph.”*

We have edited the first paragraph in an effort to make it easier to read. Identical steps were taken with the paragraph that began on line 27 (line 30 in the edited manuscript).

4. *“Delete “specifically” on line 29 and identify what you mean by “system trends” on line 31.”*

The word “specifically” has been removed, and we have expanded on what is meant by “trend”. The final sentence in the paragraph starting around L. 30 now reads:

“In climate science particularly, violations undermine the ability to determine system trends in physical quantities such as temperature, mass, as well as domain-integrated diagnostics (integrated heat and mass content) over months, decades, and longer.”

5. *“Line 50: “what is meant by “system failure”? I suggest dropping system here too. Also, this paragraph could use a re-write and definition of what is meant, e.g., by “long-duration forecasts with rigorous models”? Why are rigorous models only “likely to preserve”? Aren’t rigorous models defines as preserving quantities (besides numerical effects)?”*

We have now clarified the meaning of “system failure” by the following rewording:

“For some purposes, e.g., short-term weather or other prediction, the failure of the forecasting procedure (consisting of cycles of producing analysis increments from data followed by model forecast) to conserve mass, energy or enstrophy may be of no concern ...”

We also now clarify the difference between a rigorous model and its proper numerical implementation as follows:

“In long-duration forecasts with rigorous models, which by definition contain no observational data at all, conservation laws and other invariants of the model are preserved, provided their numerical implementation is accurate.”

6. *“Around line 60 a reference to a textbook defining, e.g., a Kalman filter, would be useful.”*

We have now added references to the textbooks by Bryson and Ho (1975) and Wunsch (2006).

7. *“In Section 2, several symbols are either used and only later defined (e.g.,  $\Delta t$  on line 67). Or they are being shown with the context coming later (the  $\tilde{x}(t, -)$  or  $\tilde{x}(t, +)$  on line 78).”*

An explanation of  $\Delta t$  has now been added. The justification of notation  $\tilde{x}(t, -)$  and  $\tilde{x}(t, +)$  is properly addressed when these variable are first introduced (now around line 85): “As borrowed from control theory convention, the minus sign in  $\tilde{x}(t, -)$  denotes a prediction of  $\mathbf{x}(t)$  not using any data at time  $t$  ...”

8. *“Line 91 and following: why do you need to go to time step  $t + \Delta t$  before you merge a model and observations? I think you can do the entire argumentation here with  $x(t, -)$ . If not, I would not understand why.”*

The reviewer is correct in noting that the argument could be done with timestep  $t$  (instead of  $t + \Delta t$ ), that is, we could assume there exists data  $\mathbf{y}(t)$  and we proceed to describe how to compute the weighted average of  $\mathbf{y}(t)$  and  $\tilde{\mathbf{x}}(t, -)$ .

Nevertheless, the discussion would end up identical ours. Our choice to conduct data assimilation at timestep  $t + \Delta t$  makes explicit the roles of the model operator  $\mathbf{A}$ , the known forcing  $\mathbf{q}$ , and the analysis increment, all within the same equation. The equations as written are self-consistent (e.g., to see this, plug eqn. (4.50) into eqn. (4.52) in Wunsch (2006)).

9. *“Section 3.1.1 and following: I don’t see where  $I_6$  was introduced and why the equation shown does imply that there is no observational null space. In fact, “null space” was not introduced.”*

We have now clarified that  $I_6$  is the six dimensional identity matrix. With regards to the second half of the comment, if  $\mathbf{E} = I_6$  then  $\mathbf{E}$  is full rank. Therefore,  $\mathbf{E}$  has a vanishing nullspace and we conclude no observational nullspace exists. It is correct that no formal definition of a nullspace has been given in the manuscript, but we opted to omit one as it is an elementary definition from linear algebra.

10. *“With reference to Fig 4 several statements are being made; but I am at lost which panel, which line statements refer to and where I should see what is being said. I suggest to re-write and expand. Holds also for other figures. While you re-write: I have trouble finding line patter (e.g., dahs-dotted) and reding lines.*

We now refer to specific panels within figures in the text. For example, L. 208 now reads:

“Until the first data point (denoted with a vertical line in Fig. 4 in all three panels) ...”

to clarify where we mean the vertical line to exist. We have done our best to distinguish between lines by having both different colors and line patterns. Where these lines coalesce (as they will under some circumstances, e.g., in the initial phase of the KF), these lines will fall on top of each other (e.g, times 0–5000 in Panel b of Fig. 4). Once the their values differ ( $t > 5000$ ) they are well separated and discernable.

11. *“Fig 11 shows in its middle panel a zoom of the top panel. But now you suddenly change line pattern. I suggest keeping them to avoid confusion. Yellow lines are always hard to red. In the bottom panel of Fig 11, I suggest to use two solid lines. You have different colors anyway.”*

Figure 11 has been recreated so that the patterns in panels (a) and (b) match. Regarding the panel (c) we have opted to stick to solid and dashed (also see previous comment about how to improve distinguishing between lines). This ensures that in the portions where the differences are similar one can see that there are in fact two lines. If both are solid one color overtakes the other and it appears as though there is only one line on the plot.

12. *“In the discussion reference is being made to ECCO, stating that identical results would be obtain in a linear case. This leaves the reader wondering: are all ECCO results equally impacted and corrupted as the once discussed here. The paper would benefit significantly by closing the circle and providing a crips discussion of what the authors belief can be accomplished at all and if in deed al results are the same or where in fact differences exist.”*

We thank the reviewer for this valid point. We have now slightly restructured the Conclusions section and added an extensive final paragraph that addresses this point.

The RTS algorithm is only one choice from several approaches to the finite interval estimation problem. Alternatives include the least-squares/Lagrange multiplier approach of the ECCO project, which in the linear case can be demonstrated to produce identical results. This approach guarantees exact dynamical and kinematic consistency of the state estimate (Stammer et al. (2002), Stammer et al. (2016), Wunsch and Heimbach (2007)), a key requirement when seeking physical understanding of the results. Such consistency is ensured by restricting observation-induced updates to those that are formally independent inputs to the conservation laws, i.e., initial, surface, or – were relevant – lateral boundary conditions. This ensures no artificial source or sink terms in the conservation equations. The ECCO project has conducted this approach with considerable success over the past two decades, and demonstrated the merits of accurate determination of heat, freshwater and momentum budgets and their constituents Heimbach et al. (2019). The Lagrange multiplier framework provides a general inverse modeling framework, which addresses several estimation problems, either separately, or jointly: (i) inference of optimal initial conditions, such as produced by incremental 4-dimensional variational data assimilation practiced in NWP; (ii)

inference of updated (or corrected) boundary conditions, such as practiced in flux inversion methods; (iii) inference of optimal model parameters, such as done in formal parameter calibration problems; or (iv) any combination thereof. A detailed exposure of this more general framework in the context similar toy models will be presented in sequel paper.

## References

- Heimbach, P., Fukumori, I., Hill, C. N., Ponte, R. M., Stammer, D., Wunsch, C., Campin, J.-M., Cornuelle, B., Fenty, I., Forget, G., et al.: Putting it all together: Adding value to the global ocean and climate observing systems with complete self-consistent ocean state and parameter estimates, *Frontiers in Marine Science*, 6, 55, 2019.
- Stammer, D., Wunsch, C., Giering, R., Eckert, C., Heimbach, P., Marotzke, J., Adcroft, A., Hill, C., and Marshall, J.: Global ocean circulation during 1992–1997, estimated from ocean observations and a general circulation model, *Journal of Geophysical Research: Oceans*, 107, 1–1, 2002.
- Stammer, D., Balmaseda, M., Heimbach, P., Köhl, A., and Weaver, A.: Ocean data assimilation in support of climate applications: status and perspectives, *Annual review of marine science*, 8, 491–518, 2016.
- Wunsch, C. and Heimbach, P.: Practical global oceanic state estimation, *Physica D: Nonlinear Phenomena*, 230, 197–208, 2007.
